# Supplementary material for: Integrating alignment-based and alignment-free sequence similarity measures for biological sequence classification
Source: PubMed Central journal article supplement — Bioinformatics. 2015 Jan 7;31(9):1396–404. doi: 10.1093/bioinformatics/btv006 (PMC4410667; doi:10.1093/bioinformatics/btv006), 2015-01-07
Supplement: supp_btv006_supplementary_data.pdf [file supp_btv006_supplementary_data.pdf]

# Supplementary Data - Integrating alignment-based and alignment-free sequence similarity measures for biological sequence classification

Ivan Borozan, Stuart Watt and Vincent Ferretti

December 2014

## 0.1 Tables

| Fragment length | PhymmBL accuracy (%) | CSSS accuracy (%) | CSSS k-mer size | CSSS (BLAST scores alone) accuracy (%) | PhymmBL (BLAST scores alone) accuracy (%) |
|-----------------|----------------------|-------------------|-----------------|----------------------------------------|-------------------------------------------|
| Full genomes    | 86.56 ± 2.19         | 91.43 ± 0.99      | 3               | 82.95 ± 1.35                           | 57.66 ± 0.93                              |
| 1000            | 68.90 ± 1.78         | 70.02 ± 2.01      | 4               | 66.93 ± 1.55                           | 31.37 ± 1.30                              |
| 500             | 57.28 ± 2.09         | 63.02 ± 1.49      | 4               | 59.98 ± 1.52                           | 26.83 ± 1.75                              |
| 100             | 29.79 ± 1.66         | 35.94 ± 3.31      | 3               | 42.06 ± 1.59                           | 19.0 ± 1.88                               |

Table 4: Shows the classification accuracy (see eq.16) for Dataset I obtained with the CSSS (1-NN classifier) and PhymmBL models when predicting 147 different viral genera across 266 viral DNA sequences as a function of the viral fragment length. The optimum value of the k-mer parameter used by the CSSS model is indicated in column 4. Columns 5 and 6 indicate the classification accuracy obtained by each model when using BLAST scores alone.

| Phylum        | PhymmBL accuracy (%) | CSSS accuracy (%) | CSSS k-mer size | CSSS (BLAST scores alone) accuracy (%) | PhymmBL (BLAST scores alone) accuracy (%) |
|---------------|----------------------|-------------------|-----------------|----------------------------------------|-------------------------------------------|
| Euryarchaeota | 81.14                | 87.03             | 4               | 32.30                                  | 0.60                                      |
| Nitrospirae   | 97.67                | 96.66             | 4               | 88.77                                  | 69.07                                     |

Table 5: Shows the classification accuracy (see eq.16) for Dataset II obtained with the CSSS (1-NN classifier) and PhymmBL models when predicting the phyla for 20907 reads (with an average of 759bp in read length) belonging to *Leptospirillum* sp. groups II and III genomes (18579 reads) and *Ferroplasma acidarmanus* genome (2328 reads). The optimum value for the k-mer parameter used by the CSSS model is indicated in column 4. Columns 5 and 6 indicate the classification performance of the BLAST scores alone as implemented in CSSS and PhymmBL models.

| Fragment size | CSSS(BLASTI scores alone)(%) | CSSS(JSD scores alone) (%) | CSSS(ED scores alone) (%) | CSSS(CB scores alone) (%) | PhymmBL (Phymm(IMMs) scores alone) (%) | PhymmBL(BLAST scores alone) (%) |
|---------------|------------------------------|----------------------------|---------------------------|---------------------------|----------------------------------------|---------------------------------|
| Full genomes  | 82.95 ± 1.35                 | 80.01 ± 1.65               | 79.98 ± 1.39              | 69.99 ± 1.50              | 85.74 ± 2.55                           | 57.66 ± 0.93                    |
| 1000          | 66.93 ± 1.55                 | 55.25 ± 2.15               | 54.21 ± 1.30              | < 10                      | 67.92±2.04                             | 31.37 ± 1.30                    |
| 500           | 59.98 ± 1.52                 | 42.79 ± 1.58               | 41.25 ± 1.66              | < 10                      | 55.78 ± 2.38                           | 26.83 ± 1.75                    |
| 100           | 42.06 ± 1.59                 | 14.40 ± 2.09               | 13.57 ± 1.24              | < 10                      | 24.36 ± 1.86                           | 19.0 ± 1.88                     |

Table 6: Shows the classification accuracy (see eq.16) obtained with individual similarity/distance measures used by the CSSS (1-NN classifier) and PhymmBL models for predicting 147 different viral genera across 266 viral DNA sequences as a function of the viral fragment length. The values of the k-mer parameter used by the JSD (see eq.5) and ED (see eq.3) similarity measures are identical to those presented in Table.4.

## 0.2 Figures

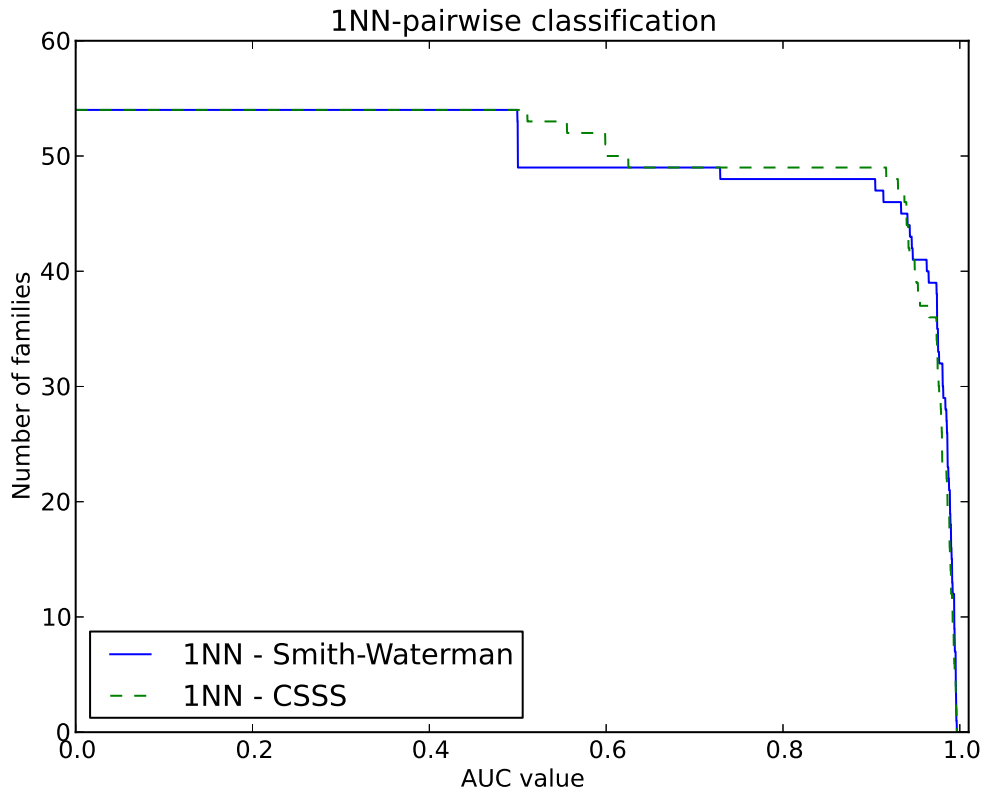

Figure 2: Shows relative classification performance of the CSSS model with the 1-NN classifier and the best performing classifier (i.e. Smith-Waterman p-values with the 1-NN classifier) presented in Kocsor *et al.*, 2006 on Dataset III used in this study. The graph plots the total number of families for which the integral of the ROC curve (AUC) exceeds a score threshold indicated on the x-axis. A higher curve indicates a more accurate classification performance.

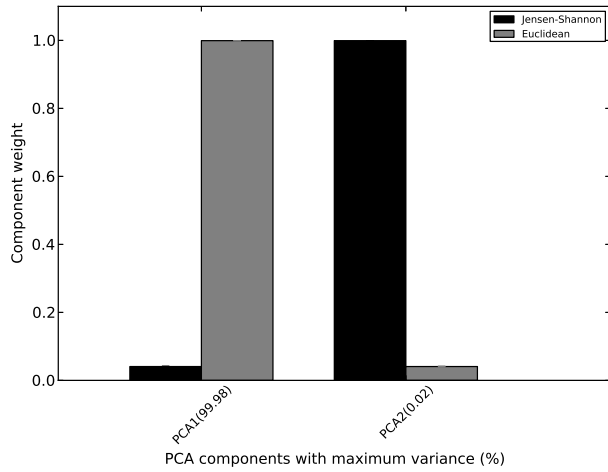

(a) Viral fragment size : full genome s

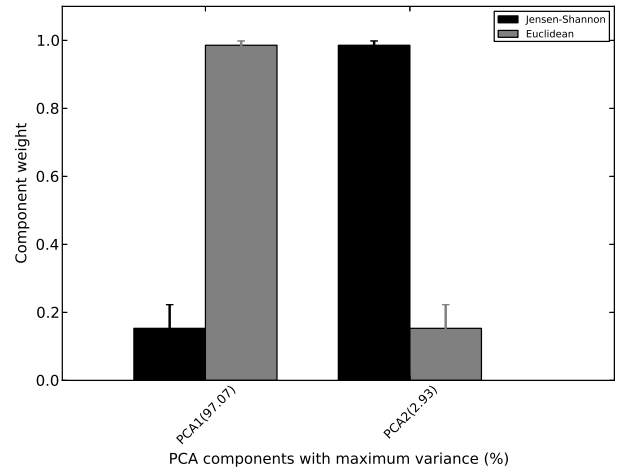

(b) Viral fragment size : 1000bp

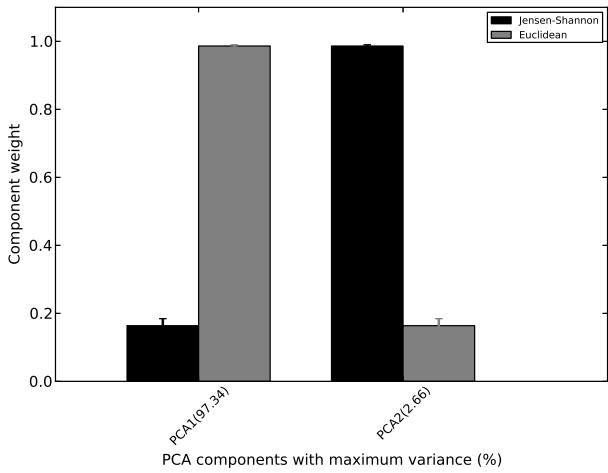

(c) Viral fragment size : 500bp

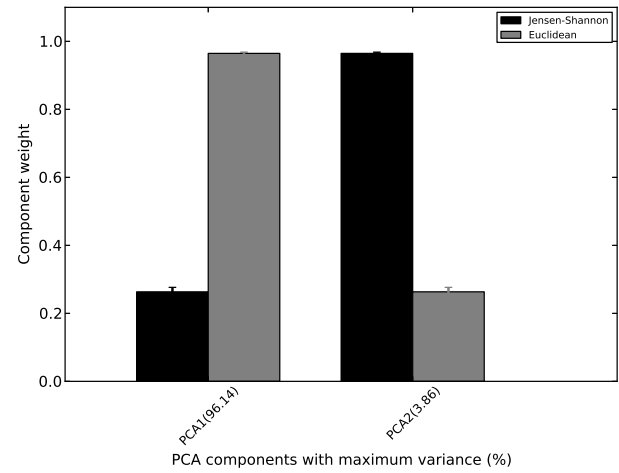

(d) Viral fragment size : 100bp

Figure 3: Shows results of the PCA analysis of similarity scores obtained using viral genomes from Dataset I. On the x-axis are shown the first two components and on the y-axis relative weights of each component. The bar plots show that the first component (PCA1) is mostly associated with the ED measure while the second component (PCA2) is mostly associated with the JSD measure independently of the viral fragment length.

### 0.3 Set of parameters used to run different models/algorithms

#### **NBC (default):**

To build the database:

```
>countncbi genomes_training_directory 15
```

To score:

```
>score -a reads_test.fasta -r 15 -j genomes_directory
```

#### **Kraken (default):**

To build the database:

```
>kraken-build --add-to-library training.fasta --db genomeDB
```

```
>kraken-build --build --db genomeDB
```

To run Kraken:

```
>kraken --preload --db genomeDB reads_test.fasta --output results_kraken.txt
```

#### **RAIphy (default):**

To build the database:

```
>raiphy -m 2 -i training.fasta
```

To run RAIphy:

```
>raiphy -i reads_test.fasta -d defaultDb -m 1 -o results_RAiphy.txt
```

#### **PAUDA (default):**

To build the database:

```
>pauda-build training.fasta paudaDB
```

To run PAUDA:

```
>pauda-run --slow reads_test.fasta results_pauda.blastx paudaDB
```

#### **PhymmBL (default):**

To build the database:

```
>customGenomicData.pl Config.txt
```

To run PhymmBL:

```
>scoreReads.pl reads_test.fasta
```

#### **PhyloPythiaS:**

Please see the instruction on the following webpage:

<http://phylopythias.cs.uni-duesseldorf.de/index.php?phase=wait>
